# Supplementary material for: Human anti-CAIX antibodies mediate immune cell inhibition of renal cell carcinoma in vitro and in a humanized mouse model in vivo
Source: PubMed Central journal article supplement (PMC4464115; doi:10.1186/s12943-015-0384-3), 2015-06-11
Supplement: 12943_2015_384_MOESM1_ESM.pdf [file 12943_2015_384_MOESM1_ESM.pdf]

## Supplementary Figure 1

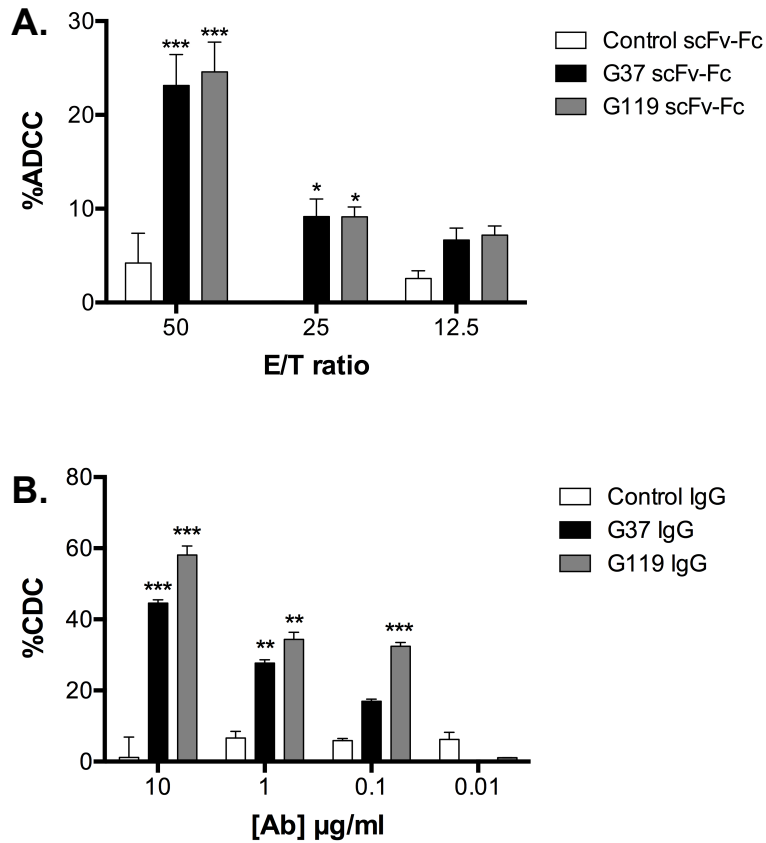

### Figure S1. The antibody-mediated killing activities on CAIX expressing RCC4 tumor cells.

**(A)** Anti-CAIX antibodies (G37 and G119) were tested for ADCC activity with human PBMCs in a dose dependent manner. CAIX<sup>+</sup> RCC4 cells were incubated with human PBMCs at an indicated ratio and 5 µg/ml of antibodies, and cytotoxicity measured by LDH release in the culture supernatant. Data represent triplicate wells of one experiment. **(B)** CDC activity was determined by culture of rabbit serum with RCC4 cells, and cytotoxicity measured as above after 6 hours. All data points represent the mean value ±S.D.. \*, \*\*, and \*\*\* represent p value of Student t-test < 0.05, 0.01, and 0.005, respectively.
