# Supplementary material for: Human anti-CAIX antibodies mediate immune cell inhibition of renal cell carcinoma in vitro and in a humanized mouse model in vivo
Source: PubMed Central journal article supplement (PMC4464115; doi:10.1186/s12943-015-0384-3), 2015-06-11
Supplement: 12943_2015_384_MOESM6_ESM.pdf [file 12943_2015_384_MOESM6_ESM.pdf]

## Supplementary Table 1

| $\alpha$ CAIX antibody | Affinity ( $K_D$ , nM) | % CA inhibition | Internalization |
|------------------------|------------------------|-----------------|-----------------|
| G119                   | 1.49                   | 25%             | +++             |
| G10                    | 1.62                   | 15%             | +               |
| G37                    | 1.89                   | 40%             | none            |
| G36                    | 3.22                   | 10%             | ++              |
| G39                    | 3.43                   | 50%             | none            |

The kinetic constants of all anti-CAIX antibodies were obtained by global analysis using a 1:1 langmuir binding model and the T100 evaluation software. Percentage of carbonic anhydrase inhibition by CAIX antibodies was estimated from an electrometric assay. Internalization measured by both flow cytometry and ImageStream. + denotes degree of internalization as measured by regular flow cytometry.
