# Supplementary material for: Human anti-CAIX antibodies mediate immune cell inhibition of renal cell carcinoma in vitro and in a humanized mouse model in vivo
Source: Springer Nature journal article supplement (doi:10.1186/s12943-015-0384-3), 2015-06-11
Supplement: MOESM3 [file 9763114]

**Supplementary Figure 3**

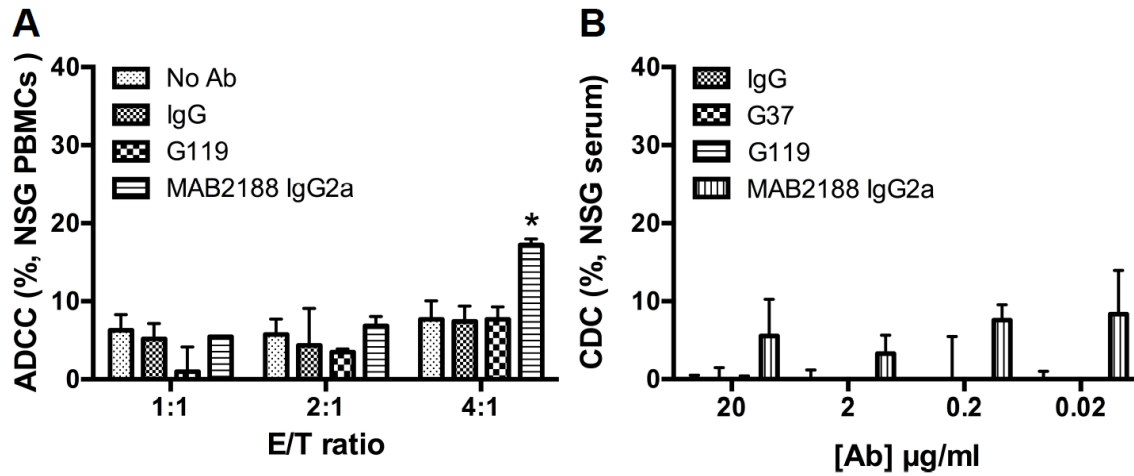

**Figure S3. The antibody-mediated killing activities on CAIX expressing tumor cells through NSG blood or serum. (A)** Human anti-CAIX mAbs (G37 or G119) and mouse anti-human CAIX antibody, MAB2188, were tested for ADCC activity against CAIX<sup>+</sup> SKRC-59 cells. NSG mouse PBMCs were isolated from untreated NSG mice, and total PBMC counted as effector cells (E) in co-culture with the respective target CAIX<sup>+</sup> SKRC-59 cells (T) for six hours. The concentration of antibodies was 5 µg/ml. **(B)** CDC activity was determined by culture of NSG mouse serum with CAIX<sup>+</sup> SKRC-59 cells, and cytotoxicity measured as above after 6 hours. Culture supernatant was examined for LDH as a measure of cytotoxicity. Data represent the mean of three independent experimental values, ± S.D.. \* represents p value of Student t-test < 0.05.
